# Supplementary material for: Migraine with active headache was associated with other painful physical symptoms at two-year follow-up among patients with major depressive disorder
Source: PLoS One. 2019 Apr 30;14(4):e0216108. doi: 10.1371/journal.pone.0216108 (PMC6490935; doi:10.1371/journal.pone.0216108)
Supplement: S1 Dataset — (XLSX) [file pone.0216108.s001.xlsx]

## Sheet: Sheet1
age	gender	educationalyear	job	married	VAR00020	migraine	var00004	B0bonepain	B0headache	B0backpain	B0abdominalpain	B0chestpain	B0shoulderpain	B0musclepain	B0limbpain	B0headachefrequency	var00010	B0HADSdepression	B0HADSanxiety	B0HAMD	VAR00001	VAR00061	y2HADSdepression	y2HADSanxiety	y2HAMD	VAR00062	y2bonepain	y2headache	y2backpain	y2abdominalpain	y2chestpain	y2shoulderpain	y2musclepian	y2limbpain	y2headachefrequency	y2remission	y2activemigraine1	y2activemigraine2
2	0	12	1	1		0		0	7	4	0	0	8	5	0	2.5		12	16	19			6	11	17		8.5	8.2	9.1	0	0	6.6	2.1	0	2.5	0	0	0
2	0	12	1	1		1		8	6	9	5	7	9	9	6	3		17	20	28			19	18	21		7.1	8.8	9.1	6.6	7	10	10	6.8	7	0	2	1
2	0	16	1	0		0		0	1.9	0	0	0	0.9	0	0	2.5		12	16	18			10	11	20		0	1.2	0	0	0	0	0	2	2	0	0	0
1	0	14	1	0		0		1	2	0	2	0	2	1	1	1		14	10	20			0	0	0		0	0	0	0	0	0	0	0	0	1	0	0
1	0	14	0	0		1		1.1	3	0	1.5	0	0	0	0	4		16	18	27			4	7	5		0	0	0	0.2	0	0.8	0.6	0	0	1	1	0
2	1	12	0	1		0		7	0	0	0	0	6.1	0	0	0		14	14	25			15	13	14		0	0	0	0	0	8.6	0	0	0	0	0	0
1	0	9	0	1		0		0	3	2	3	5	2	0	0	3		11	15	19			0	1	0		0	0	0	0	0	0	0	0	0	1	0	0
1	0	12	0	1		1		1.3	7.5	0	0	5.4	0	1.9	0	7		20	15	27			11	11	14		0	3.8	0	0	0	0	0	0	1.5	0	2	1
3	0	12	1	0		1		6.7	1.2	6.1	6	0	7.1	4.3	8	4		16	12	21			6	4	6		1.2	0	3	0	2.1	3.6	0	0	0	1	1	0
1	0	16	1	0		0		0	1.9	0	0	7.4	2.9	0	0.8	2		12	13	16			3	6	4		0	2.6	0.5	0	0	3.7	0	0	2	1	0	0
1	0	12	0	1		0		2.4	6.8	1.5	5	0	1.4	0.4	0	7		15	14	26			1	7	5		0	1.2	0	0	0	1.4	0	0	1	1	0	0
1	0	12	1	0		1		2.2	4.1	0.9	2.8	0.7	3.7	0.7	0.4	7		12	15	29			16	17	21		3.9	3	3.4	0	5.5	4.9	5.6	0	2	0	1	0
1	0	14	1	0		1		0	3	4.7	0	4.3	8	0	0	2		10	19	21			3	11	9		0	2.9	0	5.5	0	7.3	4.3	0	1	0	1	0
1	0	14	1	0		0		0	4.7	0	0	0.7	9	8.8	0	1		17	19	21			5	12	10		6.2	6.1	6.9	0	0	7.1	7.5	4.2	4	0	0	0
1	0	14	0	1		0		0	0	5.5	5.5	3	3.2	3.2	0	0		15	9	24			2	6	10		0	2.9	2.7	4.5	5.5	3.2	0	0	1	0	0	0
1	1	15	0	0		0		1.2	0.8	0	6	5	1.5	0.5	0	1		10	14	16			4	7	6		0	0	0	0.7	0	0	0	0	0	1	0	0
3	0	12	0	1		0		4.2	0	0	0	0	2.3	6	3	0		12	14	21			3	3	7		4.3	3.7	0	0	0	5.1	2.1	3.2	3	1	0	0
1	1	14	0	0		0		0	0	1	0	0	1.4	0	0	0		8	3	16			0	0	3		0	0	0	0	0	2	0	0	0	1	0	0
1	0	12	1	0		0		1.3	5.1	0	5.3	9.2	7.4	0	0	4		17	11	25			3	6	1		0.5	0.8	2.3	1	0	7.8	0.5	0.9	1	1	0	0
1	1	20	0	0		1		7.3	10	4.5	4.2	8.5	6	8.8	3.4	7		19	19	26			2	10	3		0	1.1	0	0	0	0	0	0	1	1	1	0
1	0	13	0	0		1		5.8	6.9	2.9	1.2	7.1	6.7	5.8	4.8	7		14	15	24			5	6	6		0	1	1.8	0	0	2.9	0	0	2	1	1	0
1	1	9	1	0		0		0	1.8	0	0	0	1.4	0	0	7		13	10	18			6	6	9		0.7	5	0	0	0	4.9	0	0.9	7	0	0	0
3	1	12	1	1		0		0	3.2	0	0	6.4	2.8	0	0	1		12	17	27			3	7	3		0	0	0	0	0	0.9	0	0	0	1	0	0
1	0	13	0	0		1		7.5	7.6	7.6	7.4	0	8	7.5	0	3		11	13	22			5	7	2		0	5.9	0	0	1.2	0	0	0	1	1	2	1
2	0	12	1	1		1		0	2.8	0	0	0	0.9	0	0	1		12	14	21			6	10	9		0	1.6	0	0	0	1.9	0	0	1	0	1	0
3	0	9	0	1		1		9.8	9.8	9.8	9.8	9.7	9.7	9.7	9.7	7		12	15	34			17	18	33		10	10	10	10	10	10	10	10	7	0	2	1
1	0	14	1	0		1		0	5.5	0	0	0	7.3	5.3	0	2.5		9	14	24			7	9	15		0.6	4.3	4.9	0	0	7.9	7.9	0	1.5	0	2	1
2	0	16	1	1		0		2.3	1.1	2.4	0	0	6.8	3.7	1.2	1		12	13	21			1	1	0		0	0	0	0	0	5	2.3	0.4	0	1	0	0
2	1	12	1	1		0		4.1	4.2	6.6	5.7	5.9	9.9	6.2	0.8	3		14	14	27			3	6	14		2.3	1.1	1.1	1.5	0	4.8	5.3	2.5	2	0	0	0
2	0	12	1	0		1		6.3	5.3	0	0	0	2.2	2	0	3		16	3	18			12	8	7		1.8	0.6	3.7	3.5	0	9.5	1	0	1	1	1	0
1	0	12	0	0		1		0.4	0.8	0	0	0.6	3.1	10	10	2		14	13	29			18	15	21		0	0	0	0.7	0	0.7	0.9	0	0	0	1	0
1	0	14	1	0		0		0	1	0	0	0	0	0	0	2.5		16	19	28			1	4	2		0	0.5	0	0	0	0	0	0	2.5	1	0	0
1	0	14	1	0		1		5.7	8.1	3	1.9	0	9.2	3.8	0	7		17	18	24			1	9	7		0	2.3	0	0	0	3.3	2	2.3	1	1	1	0
1	0	14	1	0		0		0	5	3.8	4.7	2.2	4.5	3.5	1.3	3		15	17	25			9	13	24		4.5	3.8	5	6.6	3.3	4.5	3.5	4.5	1	0	0	0
1	1	16	1	0		0		0	0	0	0	0	2.6	0	0	0		9	13	20			0	1	0		0	0	2	0	0	1.6	0	0	0	1	0	0
1	1	17	0	0		0		6	0	2.9	0	0	2.9	0.9	4.9	0		18	17	20			1	7	1		2.3	1.2	1.9	0	0	0.6	0.6	0	2	1	0	0
3	0	12	1	0		1		0	0.9	0.8	1.6	0	1	1.8	0	1		15	11	20			2	6	5		0	0	0	0	0	1	0	0	0	1	1	0
2	1	12	1	1		1		8.7	9.2	10	2	1.7	9.2	9.9	2.7	7		17	17	28			10	8	12		4	4.6	4.1	1.2	3.7	3.5	2.3	0.5	3	0	2	1
1	0	17	0	0		1		0.8	6.2	3.1	4.2	4.4	4.9	1.1	0	7		14	9	18			8	8	13		0.5	5.7	1.5	1.9	0	6.3	0	0	5	0	2	1
2	0	15	1	0		0		0	6.5	0	0	0	0	0	0	3		18	13	29			1	10	4		0	4.4	0	4.9	0	2.2	0.9	0	2	1	0	0
3	0	9	1	0		0		0	0.9	0.7	0	0	1.5	0	0	1.5		13	13	29			10	13	31		0	5.1	1	0	0	1.8	0	0	7	0	0	0
1	1	15	0	0		0		0	0	0	0	0	1.5	1.7	0	0		14	13	18			9	15	16		0	0	3.4	0	0	6	1.8	2.2	0	0	0	0
2	0	16	0	1		0		2.3	0	0	0	2.5	8.2	7.5	0	0		12	10	17			1	1	2		1.1	0	0	0	0	1.4	0	0	0	1	0	0
1	1	16	1	0		0		0	4.2	0	0	0	2.1	1.6	0	2		13	12	24			9	7	11		0	0	0.9	0	0	1	0	0	0	0	0	0
2	0	16	1	0		0		0	1.9	0.8	0	1.3	1.1	1.4	1.4	2.5		9	15	24			8	9	10		0	0.8	0	0	0	0	0	0	1	0	0	0
3	0	9	1	0		0		0	0	0	0	0	4.1	0	0	0		17	10	21			12	10	20		1.5	0	3.2	0	0	1.5	0	0	0	0	0	0
1	0	16	1	0		0		0	1.7	0	0	0	10	0	0	1.5		18	10	22			9	8	19		0	0	8.2	0	0	10	6.8	0	0	0	0	0
1	1	16	1	0		1		7	9.2	6.9	9.2	7.1	9.2	6.1	0	7		17	16	28			3	4	2		0	3.3	0	0	0	3.5	0	0	1	1	2	1
3	0	12	0	1		0		1.3	0	3.6	0	0	2	4.4	3.3	0		16	15	22			15	14	22		0	3.5	0	0	0	5.9	5.1	0	2	0	0	0
2	0	16	1	0		1		0	6.9	0	0	0	4.4	0	0	7		14	11	20			2	4	3		3	0	2	0	0	0	0	0	0	1	1	0
1	1	16	0	0		0		0	0	0	4.6	3.3	2.1	0	0	0		12	16	21			11	16	16		0	0.9	1.6	0	0	1.2	0	0	1	0	0	0
1	1	12	0	0		0		0	9.2	0	0	8.4	6.7	7.9	7.8	7		11	10	27			14	11	15		0	6.6	0	0	0	0	4.7	0	3	0	0	0
4	1	14	1	1		0		0	1.1	0	0	0	0	0	0	7		18	12	22			2	1	0		0.6	0	0	0	0	0	0	0	0	1	0	0
2	0	12	0	0		0		0	1.5	1.6	0	0	1.5	0.5	0	2		7	15	17			6	7	9		0	8.3	6	0	0	2.1	0	0	1	0	0	0
2	0	12	1	1		1		5.7	7.8	2.3	3.3	2	6.1	0	0	7		18	11	19			6	7	4		0	1.4	0	0	0	0.5	0	0	1.5	1	1	0
2	1	14	0	0		0		0	0.7	0	0	0	4.6	0	0	1.5		13	16	21			9	8	9		0	1.8	0	0	0	0.2	0	0	1	0	0	0
3	0	12	0	1		1		0	0.4	0	0	0	0.4	0	0	1.5		16	16	23			3	10	9		0.1	0.2	0.3	0	0	0	0	0	1	0	1	0
1	0	16	1	0		0		2.3	6.3	4	0	4.7	7.9	4.6	6.6	3.5		13	17	24			1	8	8		0	2.1	0	0.6	0	2.7	0	0	2	0	0	0
1	0	14	1	0		1		5.5	7.3	8.9	0	6.4	7	5.3	3	7		16	16	27			14	18	29		7	8.3	7.2	7.3	5.1	8.4	8	4	3	0	2	1
2	0	14	1	1		0		2.5	2.4	0	0	0	3.9	0	0	1		13	11	20			2	7	0		0	0	0	0	0	1.4	0	0	0	1	0	0
1	1	14	1	1		1		0	2.6	3.7	5.2	0.7	8.2	8.2	0.4	1		20	17	22			4	7	0		0	1.6	0	0	0	0	1.6	1.7	1	1	1	0
1	0	12	1	0		0		0	0.9	0	0	0	3.3	0	0	2		14	12	28			0	2	1		0	0.3	0	0	0	0	0	0	1	1	0	0
2	0	12	0	0		0		2.6	0	0	0	0	5.4	5.3	0	0		18	9	21			11	9	10		0	0	3.2	0	0	5	3	0	0	0	0	0
2	0	16	1	0		0		0	7.5	3.2	2.7	5.1	4.3	2	0	7		21	16	28			0	1	1		0	0	0	0	0	0	0	0	0	1	0	0
1	1	16	1	0		0		2.9	1.7	5.4	0	0.6	5.5	2.8	0	2.5		17	18	21			15	11	10		0	0.6	0	0	0	1.3	0	0	1.5	0	0	0
3	1	9	1	1		1		0	10	0	1.8	0	2.2	0	0	3		17	17	22			6	14	13		2	3.6	0	0	0	2.7	2.3	0	1	0	2	1
1	0	12	0	0		1		7.3	8.6	6.4	7.5	7.7	7.8	7.6	6.4	7		11	13	20			8	9	19		0.7	5.4	5.4	5.2	3.4	8.1	8.4	3	1.5	0	2	1
4	0	12	1	1		1		6.8	7	3.9	0	8.2	5.2	5.5	6.1	2		15	16	25			9	7	7		0	0	0	0	1	0	0	1	0	1	1	0
2	0	12	0	1		1		0	10	7.7	2.8	8	10	6.4	5.6	2		17	17	29			8	11	20		4.6	3.7	4.2	0	3	3.8	3.8	0.5	2.5	0	2	1
1	1	21	0	0		1		2.1	8.2	3.3	7.7	0.5	7.9	7.4	5.6	7		10	15	19			3	5	2		0	0.6	0	2.3	0	0	0	0	0.5	1	1	0
2	0	14	0	1		0		0	0	2.4	0	3.3	2.5	0	0	0		16	12	20			2	4	0		0	0	0	0	0	0	0	0	0	1	0	0
1	0	13	0	0		0		0	3.9	3.7	4.4	5.1	4.9	3.7	0	2.5		11	9	20			0	2	3		0	0	0	0	0	1.2	0	0	0	1	0	0
2	1	14	1	1		0		9.4	5.6	0	0	0	10	8.8	0	7		19	20	27			20	20	17		5.2	6.9	0	0	0	5.4	0	0	1	0	0	0
1	0	14	0	0		0		0	0	0	0	0	2.7	0	0	0		4	13	20			4	10	9		2.5	1.3	3.9	2.1	0	3.8	0	0	1	0	0	0
1	1	13	1	0		0		0	7.7	0	9.3	2.5	0	0	0	2		12	20	21			9	12	9		0	1.3	0	5.7	0	0	0	0	1	0	0	0
2	1	16	1	1		1		0	5.6	6.4	4.2	0	7.6	4.4	6.8	2		15	20	19			1	3	4		0	0	0	0	0	0	0	0	0	1	1	0
2	1	12	1	1		1		5.4	7.1	7.7	3.6	8.9	10	7.4	4.5	7		12	15	24			2	2	3		0	0	0	1.3	1.4	2	0	0	0	1	1	0
1	0	13	0	0		0		1.5	3.5	2.6	3.4	0	5.4	1.4	0	2.5		10	15	21			2	7	8		3	5	4	2	3	4	0	0	3.5	0	0	0
2	0	9	1	1		1		7.2	7.1	7.2	4.1	7	9	7.4	5.7	1.5		11	15	26			8	11	22		3	5	6	3	10	10	4	3	7	0	2	1
3	1	16	1	1		0		0	0	0	0	0	1.2	0	0	0		11	14	20			10	11	13		0.9	0.5	0.7	0	0.5	1.9	0.6	0.6	1	0	0	0
1	0	16	1	0		1		0	7.1	3.9	0.5	5.5	7.2	5.4	0	7		13	17	18			5	10	14		7.8	3.5	4.8	3.4	0	2.5	4.2	1.2	2.5	0	2	1
1	0	14	1	0		1		8.4	9.2	0	3.5	0	9.1	5.1	2.7	7		16	18	25			6	8	12		0	2.8	0	1.6	0	0.9	0	0	3	0	1	0
3	1	14	0	1		0		0	2	0	0	0	1	0.9	0	3		16	16	22			14	14	22		5	4.9	2.3	0	0	4.2	0.7	0	7	0	0	0
1	0	16	0	0		0		9.8	4.1	5.9	0	0	10	6.9	8.8	7		19	19	28			2	13	5		3.3	0	3	6	2.9	4.9	0	4.3	0	1	0	0
3	1	12	1	0		0		0	0	0	3.3	0	5.4	2.3	0	0		9	16	27			13	14	17		0	2.1	0	0	0	0.9	0	0	1	0	0	0
1	0	14	0	1		0		3.7	1.1	6.1	0.7	1.3	8.9	7.4	1.3	1		13	18	21			8	16	14		8.5	0.9	0	0	0	10	0	10	1.5	0	0	0
3	0	9	0	1		0		3.1	1.8	4.8	0	0	4.6	2.3	1.5	1.5		18	18	20			15	9	8		2.2	0	2.1	0	0	1.5	3.2	2	0	0	0	0
2	1	16	1	0		0		0	3.5	0	0	6.7	0	0	0	6.5		16	14	22			8	7	9		1.7	0	4.3	0	0	5.1	0	0	0	0	0	0
2	0	12	0	1		1		7.1	10	7.6	3.1	10	8.6	7	2.7	7		19	18	30			5	7	2		2.2	4	3.8	0	0	3.2	2.2	0	1	1	2	1
1	0	17	0	0		0		4.4	2.5	5.6	2.6	2.6	7.4	0.5	3.5	1.5		17	21	23			1	8	2		5.7	0	0.4	0.3	0	2.5	0	4.8	0	1	0	0
1	0	12	1	0		1		0	3.5	6.3	2.1	4.3	7	1.8	0	2.5		20	21	29			2	2	0		0	0	0	0	0	0	0	0	0	1	1	0
3	1	16	1	1		0		2.9	3.8	4.5	0.9	3.7	4.7	2.9	1.5	4		10	16	25			6	11	11		5	1.6	8	2.2	6.7	8.5	8.7	3.7	1	0	0	0
1	1	12	0	0		1		8.6	2.8	6.3	3.5	0.5	9.6	4.4	1.7	3		18	11	31			10	9	24		8.4	8.9	8.5	2	1.5	9.3	8.4	8.3	7	0	2	1
1	0	16	0	0		1		6.5	10	5.6	2.9	9	10	7.6	3.8	7		11	15	29			9	13	15		5.1	5.7	5.7	2	4	6.7	6.1	6.7	2.5	0	2	1
1	0	14	0	0		0		4.9	7	9.3	2.1	6.3	9.4	8.9	4.9	2		19	13	29			3	4	14		0	8.2	0	0	0	3.2	0	0	1	0	0	0
1	0	12	0	1		1		2	7.3	2.4	6.7	0.9	5.4	0	0	7		11	9	23			10	3	5		0	2.1	2	0.7	0	1.8	0	0	1	1	1	0
1	1	16	1	0		1		0	0.4	0	0	0.6	0.9	0	0	2		17	18	18			17	16	16		0	0.8	0	1.7	0	0	0	0	1	0	1	0
2	0	12	0	1		1		5.1	6.5	10	1.2	7.8	10	6	4.6	7		16	20	31			6	11	9		8	0	5	0	0	9.6	8.1	5.1	0	0	1	0
2	0	16	1	1		1		0	4.6	3.1	0	0	5	3.9	0	7		12	13	21			5	7	2		0	0.4	0	0	0	0	0	0	1	1	1	0
2	0	14	1	1		1		7.3	7.1	3.3	0	7.8	8.5	6.8	0	7		17	17	30			6	10	13		4.7	4.3	4	0	3.9	5	2.1	4.8	2	0	2	1
2	1	14	1	1		0		0.9	5.6	0	3.8	1.7	8.2	1.4	0	3.5		9	8	20			10	8	15		2.6	0.8	5	3.4	5.2	5.3	3.6	2.4	1	0	0	0

## Sheet: Sheet2
		Note
		B0 = data at bseline
		y2 = data at the two-year follow-up
		age
		1= 19-29 years
		2= 30-39 years
		3 = 40-49 years
		4 = 50-59 years
